# Supplementary material for: Earliest amyloid and tau deposition modulate the influence of limbic networks during closed-loop hippocampal downregulation
Source: PubMed Central journal article supplement — Brain. 2020 Feb 24;143(3):976–92. doi: 10.1093/brain/awaa011 (PMC7089658; doi:10.1093/brain/awaa011), 2020-02-24
Supplement: awaa011_supplementary_data.pdf [file awaa011_supplementary_data.pdf]

**Supplementary Table 1. Cognitive Reserve Questionnaire (CRQ).**

A questionnaire developed in Spanish (Rami et al., 2011), comprised of 8 questions whose total score serves as a proxy for cognitive reserve (this is not an official translation).

| Items (mark the highest applicable option) |                                                                          | Scoring |
|--------------------------------------------|--------------------------------------------------------------------------|---------|
| 1                                          | <b>Years of education / Academic achievement</b>                         |         |
|                                            | No formal education                                                      | 0       |
|                                            | Self-taught reading and writing                                          | 1       |
|                                            | Basic education (<6 years)                                               | 2       |
|                                            | Primary education (≥6 years)                                             | 3       |
|                                            | Secondary education (≥9 years)                                           | 4       |
|                                            | Higher education                                                         | 5       |
| 2                                          | <b>Parental level of education</b>                                       |         |
|                                            | No formal education                                                      | 0       |
|                                            | Basic or primary education                                               | 1       |
|                                            | Secondary or higher education                                            | 2       |
| 3                                          | <b>Occupational training courses</b>                                     |         |
|                                            | None                                                                     | 0       |
|                                            | One or two                                                               | 1       |
|                                            | Between two and five                                                     | 2       |
|                                            | More than five                                                           | 3       |
| 4                                          | <b>Occupation</b>                                                        |         |
|                                            | No employment (includes housekeeping)                                    | 0       |
|                                            | Manual labour                                                            | 1       |
|                                            | Skilled labour (includes secretarial and technical professions)          | 2       |
|                                            | Highly skilled labour (requiring higher education)                       | 3       |
|                                            | Managerial labour                                                        | 4       |
| 5                                          | <b>Musical Training</b>                                                  |         |
|                                            | Does not play an instrument nor listens to music frequently              | 0       |
|                                            | Amateur musician or music aficionado                                     | 1       |
|                                            | Formal musical training                                                  | 2       |
| 6                                          | <b>Languages (ability to maintain a conversation)</b>                    |         |
|                                            | Only in one language (mother tongue)                                     | 0       |
|                                            | Two languages (includes spanish, galician, catalan and basc)             | 1       |
|                                            | Two or three languages (with one different to galician, catalan or basc) | 2       |
|                                            | More than 2 languages                                                    | 3       |
| 7                                          | <b>Reading activity</b>                                                  |         |
|                                            | Never                                                                    | 0       |
|                                            | Occasionally                                                             | 1       |
|                                            | Two to five books per year                                               | 2       |
|                                            | Five to ten books per year                                               | 3       |
|                                            | More than ten books per year                                             | 4       |
| 8                                          | <b>Playing intellectual games (chess, puzzles, crosswords, etc.)</b>     |         |
|                                            | Never or rarely                                                          | 0       |
|                                            | Occasionally (up to five times per month)                                | 1       |
|                                            | Frequently (more than five times per month)                              | 2       |

**Supplementary Table 2. Comparative demographics and performance of four participants with subjective cognitive decline (SCD).**

|                                                          | <b>Entire Sample</b><br>N = 48<br>m / f = 21 / 27 | <b>Controls</b><br>n <sub>a</sub> = 18<br>m / f = 7 / 11 | <b>SCD</b><br>n <sub>b</sub> = 4<br>m / f = 0 / 4 | <b>PreAD</b><br>n <sub>d</sub> = 7<br>m / f = 4 / 3 |
|----------------------------------------------------------|---------------------------------------------------|----------------------------------------------------------|---------------------------------------------------|-----------------------------------------------------|
| <b>Age</b>                                               | M = 62.705<br>SD = 4.628                          | M = 62.143<br>SD = 4.690                                 | M = 65.468<br>SD = 2.197                          | M = 64.919<br>SD = 3.202                            |
| <b>Aβ42</b>                                              | M = 1186.200<br>SD = 424.678                      | M = 1492.111<br>SD = 232.529                             | M = 921.700<br>SD = 362.514                       | M = 771.06<br>SD = 190.47                           |
| <b>p-Tau</b>                                             | M = 18.233<br>SD = 9.007                          | M = 14.735<br>SD = 3.046                                 | M = 20.625<br>SD = 7.294                          | M = 26.513<br>SD = 6.554                            |
| <b>t-Tau</b>                                             | M = 220.273<br>SD = 86.623                        | M = 1.906<br>SD = 37.090                                 | M = 244.500<br>SD = 65.579                        | M = 285.071<br>SD = 55.774                          |
| <b>p-Tau / Aβ42</b>                                      | M = 0.017<br>SD = 0.010                           | M = 0.010<br>SD = 0.002                                  | M = 0.024<br>SD = 0.010                           | M = 0.035<br>SD = 0.009                             |
| <b>FCSRT<br/>Total recall</b>                            | M = 44.292<br>SD = 3.989                          | M = 43<br>SD = 5.053                                     | M = 44<br>SD = 5.354                              | M = 45<br>SD = 2.082                                |
| <b>FCSRT<br/>Retention Index</b>                         | M = 0.980<br>SD = 0.066                           | M = 0.980<br>SD = 0.077                                  | M = 0.973<br>SD = 0.136                           | M = 0.973<br>SD = 0.033                             |
| <b>FCSRT<br/>Delayed cued<br/>recall</b>                 | M = 3.708<br>SD = 1.675                           | M = 3.667<br>SD = 1.910                                  | M = 3.250<br>SD = 1.500                           | M = 3.429<br>SD = 1.902                             |
| <b>FCSRT<br/>Delayed free<br/>recall</b>                 | M = 11.479<br>SD = 1.935                          | M = 11.222<br>SD = 2.315                                 | M = 11.750<br>SD = 2.217                          | M = 12<br>SD = 2                                    |
| <b>FCSRT<br/>Total free recall</b>                       | M = 28.562<br>SD = 5.379                          | M = 27.889<br>SD = 6.173                                 | M = 27.750<br>SD = 6.850                          | M = 26.857<br>SD = 5.014                            |
| <b>FCSRT<br/>Total cued<br/>recall</b>                   | M = 15.729<br>SD = 4.409                          | M = 15.111<br>SD = 4.071                                 | M = 16.250<br>SD = 2.363                          | M = 18.143<br>SD = 4.413                            |
| <b>FCSRT<br/>Total delayed<br/>recall</b>                | M = 15.187<br>SD = 1.214                          | M = 14.889<br>SD = 1.323                                 | M = 15<br>SD = 1.414                              | M = 15.429<br>SD = 0.534                            |
| <b>WAIS IV<br/>Visual Puzzles<br/>Total Score</b>        | M = 13.083<br>SD = 4.297                          | M = 13.222<br>SD = 4.023                                 | M = 14<br>SD = 5.598                              | M = 12.143<br>SD = 4.670                            |
| <b>CRQ score</b>                                         | M = 16.479<br>SD = 3.724                          | M = 15.778<br>SD = 4.427                                 | M = 17.500<br>SD = 2.887                          | M = 15.429<br>SD = 3.690                            |
| <b>Years of<br/>education</b>                            | M = 13.750<br>SD = 3.778                          | M = 13.444<br>SD = 3.959                                 | M = 15.500<br>SD = 2.646                          | M = 13.000<br>SD = 3.697                            |
| <b>Hippocampal<br/>volume / TIV</b>                      | M = 0.005<br>SD = 0.001                           | M = 0.005<br>SD = 0.001                                  | M = 0.005<br>SD = 0.001                           | M = 0.005<br>SD = 0.001                             |
| <b>Hippocampal<br/>down-<br/>regulation NF<br/>score</b> | M = -0.038<br>SD = 0.462                          | M = -0.098<br>SD = 0.437                                 | M = 0.182<br>SD = 0.476                           | M = -0.043<br>SD = 0.568                            |
| <b>Mean EC in<br/>CA1</b>                                | M = 0.282<br>SD = 0.040                           | M = 0.290<br>SD = 0.037                                  | M = 0.290<br>SD = 0.022                           | M = 0.277<br>SD = 0.054                             |
